# Supplementary material for: Kazak faecal microbiota transplantation induces short-chain fatty acids that promote glucagon-like peptide-1 secretion by regulating gut microbiota in db/db mice
Source: PubMed Central journal article supplement (PMC8366640; doi:10.1080/13880209.2021.1954667), 2021-08-15
Supplement: IPHB_A_1954667_SM0915.pdf [file IPHB_A_1954667_SM0915.pdf]

Amend Letter of Ethics Committee of First Affiliated Hospital of  
Xinjiang Medical University

Approval No: 20140212-113

Approval data: February 17<sup>th</sup>, 2014

Project title: Interaction of genetic and environmental factors in type 2 diabetes mellitus [U1403322]

Project leader: Dr. Linlin Li

Approval comments:

The Ethics Committee of the hospital considered the project to meet the ethical requirements through review and approved the application.

Signature of the Chair of the Ethics Committee: Jian Liu

Date: February 17<sup>th</sup>, 2014
