# Supplementary material for: Kazak faecal microbiota transplantation induces short-chain fatty acids that promote glucagon-like peptide-1 secretion by regulating gut microbiota in db/db mice
Source: PubMed Central journal article supplement (PMC8366640; doi:10.1080/13880209.2021.1954667), 2021-08-15
Supplement: IPHB_A_1954667_SM0921.pdf [file IPHB_A_1954667_SM0921.pdf]

**The PCR product sequences of target bacteria.**

| Target bacteria                         | PCR product sequences                                                                                                                                                                                                                                        |
|-----------------------------------------|--------------------------------------------------------------------------------------------------------------------------------------------------------------------------------------------------------------------------------------------------------------|
| <i>Clostridium</i>                      | GGGGGGGAGCCCTTCAGGGCGGAAGACATGTGGTGCATGGTTGT<br>CGTCAGCTCGTGTCGTGAGATGTTGGGTTAAGTCCCGCACAG                                                                                                                                                                   |
| <i>Bacteroides</i>                      | GTGGGTAGACGTCCGGTTGTAAGTCTTTTATATCGGAATTA<br>GGGGCACCTGGGCCTTTTTGCATGTACCTTATGAATAAGGATCGG<br>CTAACTCCGTGCCAGCAGCCGCGTAATACGGAGGATCCGAGCG<br>TTATCCGGATTTATTGGGTTTAAAGGGAGCGTAGATGGGTTGTTA<br>AGTCAGTTGTGAAAGTTTGCGGA                                        |
| <i>Sutterella</i>                       | AAGGGGGTAGATGACGTCATCCACCTTCTCCGGTTTGTACCG<br>GCAGTCTCACTAGAGTGCCCTTTCGTAGCAACTAGTGACAAGGGT<br>TGCGCTCGTTGCGGGACTTAACCCAACATCTCACGACACGAGCTG<br>ACGACAGCCATGCAGCACCTGTGTTTCAGACGCCCTTGCGGGCACA<br>CTCTCATTACAAAAGCTTCTCTGACATGTCAAGGCTAGGTAAGGT<br>TTTTCGCGA |
| <i>Mucispirillum<br/>schaedleri</i>     | AGCCTTGGGGCAGTAGGCGGTGTTGTAGTCATTAGTCAAAGACTA<br>GAGCTCAACTTTAGTAAGGCTAGTGATACTATAACTAGAGTAT<br>CAGAGAGGATTGCAGAATTCCTGGTGTAGCGGTGAAATGCGTAG<br>ATATCAGGAGGAATACCGTTAGCGAAGGCGGCAATCTGGCTGGA                                                                 |
| <i>Ruminococcus<br/>gnavus</i>          | GCGGCATTGCCTGGTGTCTCTCTATATCTACGCATTTACCGCTAC<br>ACTAGGAATTCCACTTACCTCTCCGACACTCTAGCCTGACAGTTC<br>CAAATGCAGTCC                                                                                                                                               |
| <i>Bacteroides<br/>uniformis</i>        | GGGGGGCATCTTGACCTATCCATCGATGCCTTGGTGGGCCGTTAC<br>CCCGCCAACAAGCTAATGGAACGCATCCCCATCGATGACCGAAA<br>TTCTTTAATAGTTCTACCATGCG                                                                                                                                     |
| <i>Faecalibacterium<br/>prausnitzii</i> | GGACAAGGTGGTCCGCCACAAGGCGACGATCGGTAGCCAGGACT<br>GAGAGGTTGAACGGCCACATTGGGACTGAGACACGGCCCAGACT<br>CCTACGGGAGGCAGCAGTGGGGAATATTGCACAATGGGGGAAAC<br>CCTGATGCAGCAACGCCGCGTGGAGGAAGTAGGTCTTCAGAAAA<br>T                                                            |
